# Supplementary material for: Peroxiredoxins as Markers of Oxidative Stress in IgA Nephropathy, Membranous Nephropathy and Lupus Nephritis
Source: PubMed Central journal article supplement (PMC8677691; doi:10.1007/s00005-021-00638-1), 2021-12-16
Supplement: 5_2021_638_MOESM1_ESM.pdf [file 5_2021_638_MOESM1_ESM.pdf]

Supplementary Table 1. Spearman's correlation analysis of PRDXs in relation to biochemical and clinical characteristics.

| Group       | Parameter                         | P-value | R      | R <sup>2</sup> |
|-------------|-----------------------------------|---------|--------|----------------|
| <b>GN</b>   |                                   |         |        |                |
| PRDX 1      | Serum alfa-1 (g/dL)               | 0.036   | -0.274 | 0.075          |
| PRDX 1      | Serum beta-2 (g/dL)               | 0.014   | 0.319  | 0.102          |
| PRDX 2      | Age (years)                       | 0.001   | 0.306  | 0.093          |
| PRDX 2      | HGB (g/dL)                        | 0.001   | -0.395 | 0.156          |
| PRDX 2      | HCT (L/L)                         | 0.001   | -0.358 | 0.128          |
| PRDX 2      | Serum creatinine (mg/dL)          | 0.004   | 0.274  | 0.075          |
| PRDX 2      | eGFR (mL/min/1.73m <sup>2</sup> ) | 0.001   | -0.402 | 0.161          |
| PRDX 3      | WBC (G/L)                         | 0.007   | -0.260 | 0.068          |
| PRDX 3      | C4 (mg/dL)                        | 0.033   | -0.243 | 0.059          |
| PRDX 3      | Serum creatinine (mg/dL)          | 0.001   | -0.341 | 0.116          |
| PRDX 3      | eGFR (mL/min/1.73m <sup>2</sup> ) | 0.002   | 0.301  | 0.091          |
| PRDX 3      | Proteinuria (g/24h)               | 0.013   | -0.250 | 0.063          |
| PRDX 3      | Serum beta-2 (g/dL)               | 0.026   | -0.290 | 0.084          |
| PRDX 4      | Serum alfa-1 (g/dL)               | 0.009   | 0.335  | 0.112          |
| PRDX 4      | Serum beta-2 (g/dL)               | 0.020   | -0.302 | 0.091          |
| PRDX 5      | Age (years)                       | 0.006   | -0.262 | 0.069          |
| PRDX 5      | BMI (kg/m <sup>2</sup> )          | 0.009   | -0.250 | 0.063          |
| <b>IgAN</b> |                                   |         |        |                |
| PRDX 1      | C4 (mg/dL)                        | 0.031   | -0.329 | 0.108          |
| PRDX 1      | Serum alfa-1 (g/dL)               | 0.032   | -0.348 | 0.121          |
| PRDX 1      | Serum beta-1 (g/dL)               | 0.001   | -0.555 | 0.308          |
| PRDX 1      | Serum beta-2 (g/dL)               | 0.021   | 0.373  | 0.139          |
| PRDX 1      | Serum A/G ratio                   | 0.019   | 0.378  | 0.144          |
| PRDX 2      | HGB (g/dL)                        | 0.025   | -0.328 | 0.107          |
| PRDX 2      | Serum creatinine (mg/dL)          | 0.005   | 0.403  | 0.162          |
| PRDX 2      | eGFR (mL/min/1.73m <sup>2</sup> ) | 0.001   | -0.486 | 0.236          |
| PRDX 3      | Serum creatinine (mg/dL)          | 0.023   | -0.332 | 0.110          |
| PRDX 3      | eGFR (mL/min/1.73m <sup>2</sup> ) | 0.041   | 0.299  | 0.089          |
| PRDX 3      | Serum beta-2 (g/dL)               | 0.018   | -0.383 | 0.147          |
| PRDX 4      | Serum beta-2 (g/dL)               | 0.004   | -0.451 | 0.204          |
| PRDX 5      | BMI (kg/m <sup>2</sup> )          | 0.012   | -0.364 | 0.132          |
| <b>MN</b>   |                                   |         |        |                |
| PRDX 2      | WBC (G/L)                         | 0.020   | 0.453  | 0.205          |
| PRDX 2      | Proteinuria (g/24h)               | 0.014   | 0.497  | 0.247          |
| PRDX 2      | Serum beta-2 (g/dL)               | 0.033   | -0.642 | 0.413          |
| PRDX 3      | eGFR (mL/min/1.73m <sup>2</sup> ) | 0.041   | 0.404  | 0.163          |
| PRDX 5      | Age (years)                       | 0.007   | -0.517 | 0.268          |
| <b>LN</b>   |                                   |         |        |                |
| PRDX 1      | WBC (G/L)                         | 0.025   | -0.377 | 0.142          |
| PRDX 1      | C3 (mg/dL)                        | 0.005   | -0.515 | 0.265          |
| PRDX 1      | C4 (mg/dL)                        | 0.008   | -0.491 | 0.241          |

|        |                                   |       |        |       |
|--------|-----------------------------------|-------|--------|-------|
| PRDX 1 | Serum beta-1 (g/dL)               | 0.048 | 0.636  | 0.404 |
| PRDX 1 | Serum A/G ratio                   | 0.042 | -0.649 | 0.421 |
| PRDX 2 | Age (years)                       | 0.034 | 0.360  | 0.130 |
| PRDX 2 | HGB (g/dL)                        | 0.005 | -0.465 | 0.216 |
| PRDX 2 | HCT (L/L)                         | 0.011 | -0.424 | 0.180 |
| PRDX 2 | Serum creatinine (mg/dL)          | 0.016 | 0.403  | 0.162 |
| PRDX 2 | eGFR (mL/min/1.73m <sup>2</sup> ) | 0.001 | -0.573 | 0.329 |
| PRDX 3 | C3 (mg/dL)                        | 0.032 | -0.405 | 0.164 |
| PRDX 3 | C4 (mg/dL)                        | 0.035 | -0.401 | 0.161 |

**Only significant associations with P < 0.05 are presented.**
